# Supplementary material for: Preparation and properties of broadband reflective cholesteric-phase liquid crystal films based on chiral and achiral bilayer structures
Source: Royal Society of Chemistry journal article supplement (doi:10.1039/d4tc02563f), 2024-01-01
Supplement: d4tc02563f1.pdf [file d4tc02563f1.pdf]

## Supporting information

Preparation and properties of broad-band reflective cholesteric-  
phase liquid crystal films based on Chiral and achiral Bilayers

structure

*Yazhen XU<sup>a</sup>, Wanli HE<sup>a\*</sup>, Xiaolong SHENG<sup>a</sup>, Zhou YANG<sup>a</sup>, Hui CAO<sup>a</sup> and  
Dong WANG<sup>a</sup>*

*a Department of Materials Science and Engineering, University of Science and  
Technology Beijing, Beijing, 100083, China*

*Corresponding author e-mail address: hewanli@mater.ustb.edu.cn*

## Experimental Section

In this experiment, the method of orthogonal experiment was adopted to design the experiment, and two groups of orthogonal experiments was designed to investigate the influence of different factors on the reflected wave width, the design of orthogonal experiments of group A and the results are shown in **Table S1**, the orthogonal experiments of group A are carried out to set three levels for the four factors to be investigated, respectively, on the content of HCM021 and C6M, as well as on the time of the polymerization of the N\* layer and N layer, and the ultraviolet transmittance spectra and broadband of the samples in group A are shown in **Figure S1**. The optimal content of C6M was determined by the analysis of polar deviation. In the subsequent experiments, 10% of C6M was taken to continue the investigation on the effects of HCM021, the polymerization time of the N\* layer, the N layer and the intensity of UV illumination on the reflected broadband  $\Delta\lambda$ . The design of orthogonal experiments in group B is shown in **Table S2**, and the UV transmittance spectra of the samples in group B and the reflected broadband are shown in **Figure S2**.

**K1,K2,K3** is the sum of experimental results obtained at the same level of different factors, **K1,K2,K3** is the mean value obtained by dividing **K1,K2,K3** by the number of levels, and R is the extreme difference between **K1,K2,K3**.

$$R = k_{max} - k_{min} \text{ (Equation 1)}$$

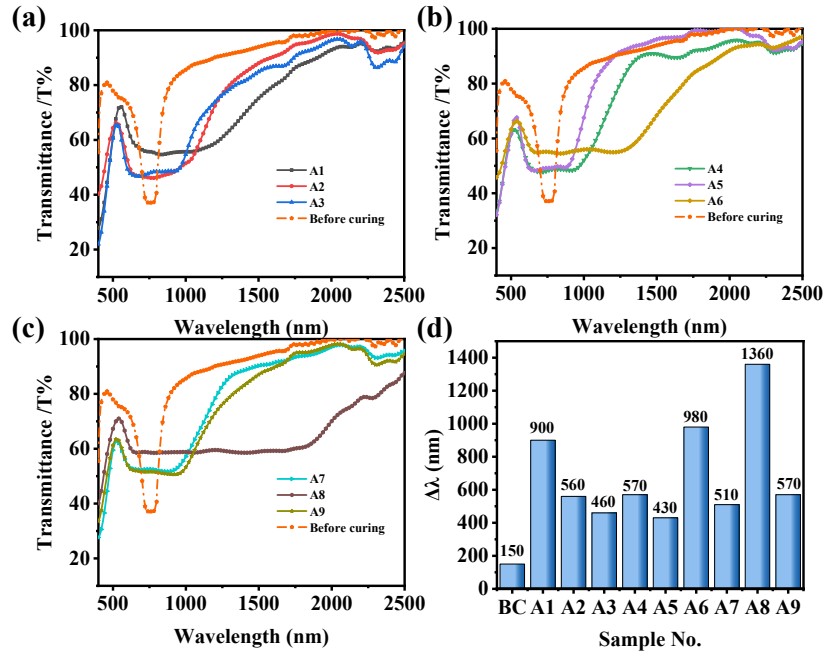

**Figure S1.** (a)-(c) UV transmission spectra of A1-A9, (d) reflected broadband of A1-A9

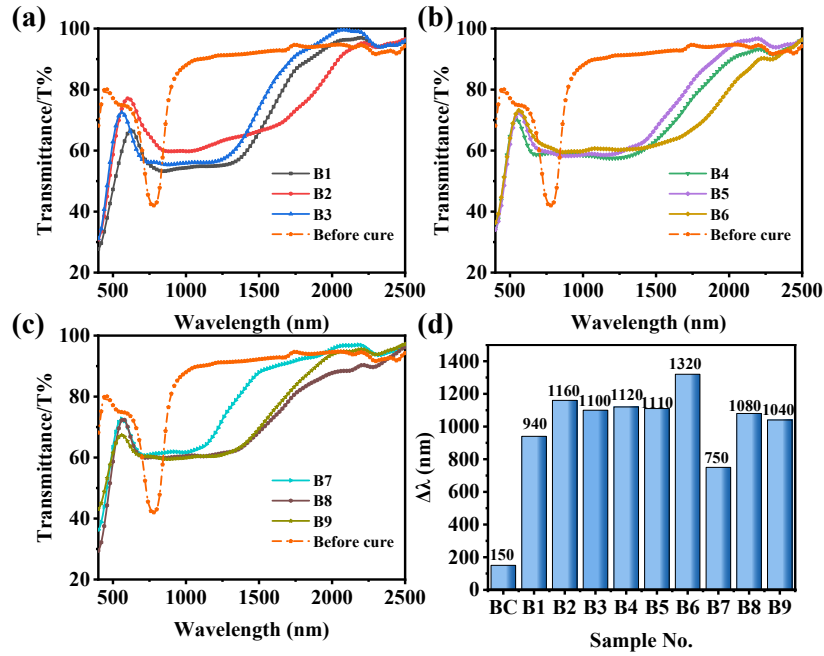

**Figure S2.** UV transmission spectra of B1-B9, (d) reflected broadband of B1-B9

**Table S1.**Results of orthogonal experiments in group A

| Sample No. | HCM021<br>(w t%) | C6M<br>(w t%) | N*Polymerizati<br>on time (min) | N Polymerization<br>time (min) | $\Delta \lambda(\text{nm})$ |
|------------|------------------|---------------|---------------------------------|--------------------------------|-----------------------------|
| A1         | 10%              | 5%            | 7                               | 10                             | 900                         |
| A2         | 10%              | 10%           | 9                               | 20                             | 560                         |
| A3         | 10%              | 15%           | 11                              | 30                             | 460                         |
| A4         | 15%              | 5%            | 9                               | 30                             | 570                         |
| A5         | 15%              | 10%           | 11                              | 10                             | 430                         |
| A6         | 15%              | 15%           | 7                               | 20                             | 980                         |
| A7         | 20%              | 5%            | 11                              | 20                             | 510                         |
| A8         | 20%              | 10%           | 7                               | 30                             | 1360                        |
| A9         | 20%              | 15%           | 9                               | 10                             | 570                         |
| K1         | 1920             | 1980          | 3240                            | 1900                           |                             |
| K2         | 1980             | 2350          | 1700                            | 2050                           |                             |
| K3         | 2440             | 2010          | 1400                            | 2390                           |                             |
| k1         | 640              | 660           | 1080                            | 633                            |                             |
| k2         | 660              | 783           | 566                             | 683                            |                             |
| k3         | 813              | 670           | 466                             | 796                            |                             |
| R          | 173              | 123           | 614                             | 163                            |                             |

**Table S2.**Results of orthogonal experiments in group B

| Sample No. | HCM021<br>(w t%) | UV light<br>intensity<br>(mW/cm <sup>2</sup> ) | N*Polymerization<br>time (min) | N Polymerization<br>time (min) | $\Delta \lambda(\text{nm})$ |
|------------|------------------|------------------------------------------------|--------------------------------|--------------------------------|-----------------------------|
| B1         | 25%              | 0.5                                            | 6                              | 30                             | 940                         |
| B2         | 25%              | 0.4                                            | 6.5                            | 40                             | 1160                        |
| B3         | 25%              | 0.3                                            | 7                              | 50                             | 1100                        |
| B4         | 30%              | 0.5                                            | 6.5                            | 50                             | 1120                        |
| B5         | 30%              | 0.4                                            | 7                              | 30                             | 1110                        |
| B6         | 30%              | 0.3                                            | 6                              | 40                             | 1320                        |
| B7         | 35%              | 0.5                                            | 7                              | 40                             | 750                         |
| B8         | 35%              | 0.4                                            | 6                              | 50                             | 1080                        |
| B9         | 35%              | 0.3                                            | 6.5                            | 30                             | 1040                        |
| K1         | 3200             | 2810                                           | 3340                           | 3090                           |                             |
| K2         | 3550             | 3350                                           | 3320                           | 3230                           |                             |
| K3         | 2870             | 3460                                           | 2960                           | 3300                           |                             |
| k1         | 1066             | 936                                            | 1113                           | 1030                           |                             |
| k2         | 1183             | 1116                                           | 1106                           | 1076                           |                             |
| k3         | 956              | 1153                                           | 986                            | 1100                           |                             |
| R          | 227              | 217                                            | 127                            | 70                             |                             |

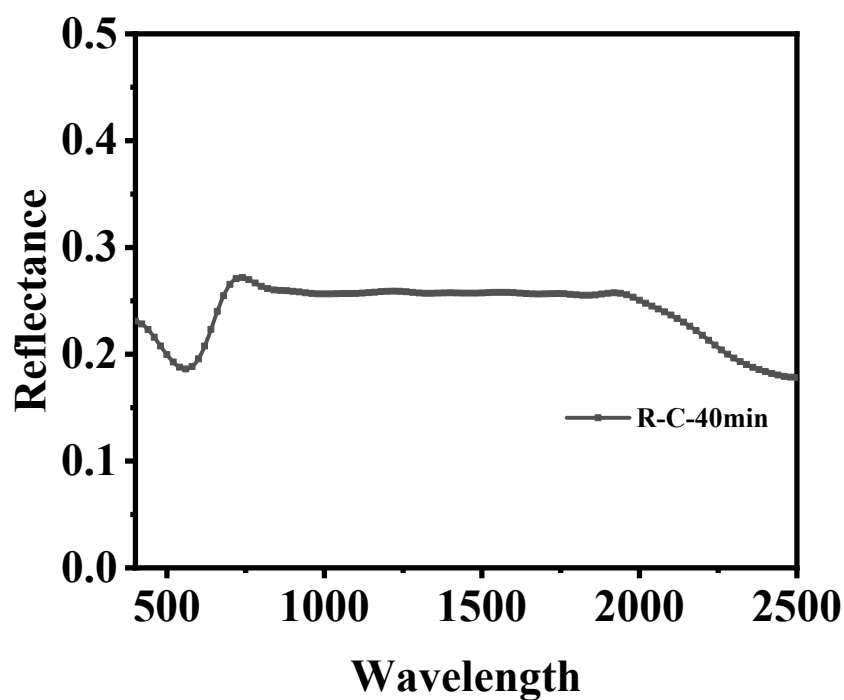

Figure S3. UV reflectance of sample No C

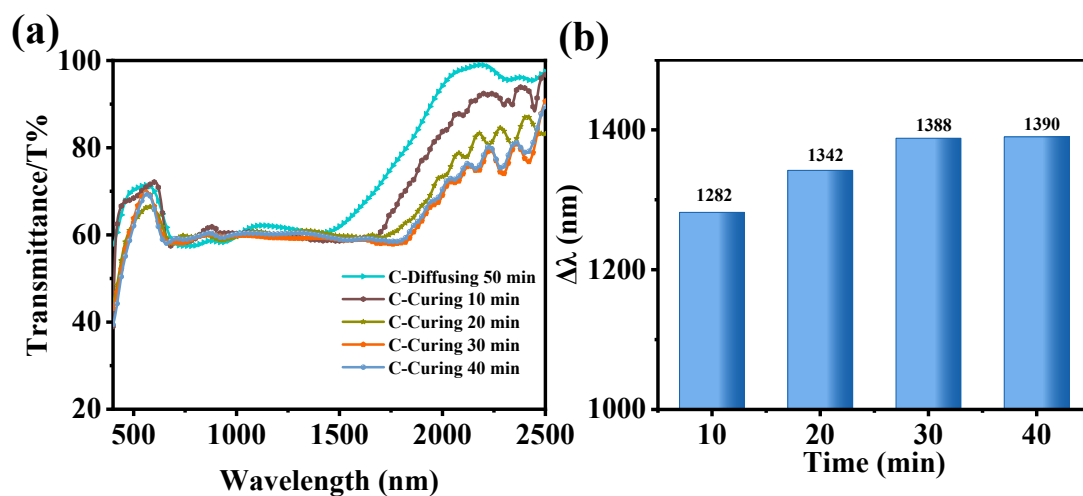

Figure S4 (a) UV spectra of sample C at different times of polymerization after fifty minutes of diffusion, (b) reflected broadband of sample C at different times of polymerization after 50 min of diffusion.
